# Supplementary material for: Change of direction asymmetry across different age categories in youth soccer
Source: PeerJ. 2020 Jul 27;8:e9486. doi: 10.7717/peerj.9486 (PMC7391970; doi:10.7717/peerj.9486)
Supplement: Supplemental Information 1 — Each row represents an individual data along with each dependent variables including also the asymmetric index. Data from the robust analysis are shown in two separate columns. [file peerj-08-9486-s001.xlsx]

## Sheet: Foglio1
	Cdd D	Cdd ND	foot plant	Media Cdd	Deficit D	Deficit ND	Asym Index Deficit		Robust data set		10% Trimmed
U18	2.24	2.34	s	2.29	0.38	0.48	-26.3158		U18	-48.6486	-17.5439
	2.38	2.46	d	2.42	0.53	0.61	-15.0943			-26.3158	-17.5439
	2.29	2.29	d	2.29	0.53	0.53	0			-17.5439	-17.5439
	2.23	2.23	d	2.23	0.47	0.47	0			-15.6863	-15.6863
	2.18	2.22	d	2.2	0.44	0.48	-9.09091			-15.0943	-15.0943
	2.25	2.25	d	2.25	0.53	0.53	0			-14.2857	-14.2857
	2.1	2.15	s	2.125	0.35	0.4	-14.2857			-12.963	-12.963
	2.36	2.46	d	2.41	0.57	0.67	-17.5439			-9.80392	-9.80392
	2.19	2.21	s	2.2	0.45	0.47	-4.44444			-9.09091	-9.09091
	2.22	2.27	d	2.245	0.51	0.56	-9.80392			-9.09091	-9.09091
	2.2	2.27	s	2.235	0.54	0.61	-12.963			-4.44444	-4.44444
	2.13	2.13	d	2.13	0.47	0.47	0			-4.16667	-4.16667
	2.19	2.19	d	2.19	0.48	0.48	0			0	0
	2.25	2.43	d	2.34	0.37	0.55	-48.6486			0	0
	2.26	2.34	d	2.3	0.51	0.59	-15.6863			0	0
	2.22	2.24	d	2.23	0.48	0.5	-4.16667			0	0
	2.16	2.2	d	2.18	0.44	0.48	-9.09091			0	0
U17	2.38	2.43	s	2.405	0.55	0.6	-9.09091
	2.31	2.39	d	2.35	0.5	0.58	-16
	2.34	2.34	d	2.34	0.55	0.55	0
	2.33	2.4	s	2.365	0.53	0.6	-13.2075		U17	-33.3333	-23.5294
	2.44	2.48	s	2.46	0.54	0.58	-7.40741			-32.7273	-23.5294
	2.25	2.32	d	2.285	0.53	0.6	-13.2075			-23.5294	-23.5294
	2.32	2.41	d	2.365	0.47	0.56	-19.1489			-19.1489	-19.1489
	2.19	2.22	d	2.205	0.49	0.52	-6.12245			-16	-16
	2.34	2.39	d	2.365	0.5	0.55	-10			-13.2075	-13.2075
	2.32	2.5	d	2.41	0.55	0.73	-32.7273			-13.2075	-13.2075
	2.24	2.29	d	2.265	0.44	0.49	-11.3636			-11.3636	-11.3636
	2.42	2.54	s	2.48	0.51	0.63	-23.5294			-10	-10
	2.32	2.34	d	2.33	0.58	0.6	-3.44828			-9.09091	-9.09091
	2.23	2.27	d	2.25	0.46	0.5	-8.69565			-8.69565	-8.69565
	2.23	2.26	d	2.245	0.42	0.45	-7.14286			-7.40741	-7.40741
	2.27	2.28	d	2.275	0.62	0.63	-1.6129			-7.14286	-7.14286
	2.16	2.29	d	2.225	0.39	0.52	-33.3333			-6.12245	-6.12245
U16	2.26	2.31	d	2.285	0.45	0.5	-11.1111			-3.44828	-3.44828
	2.18	2.27	d	2.225	0.44	0.53	-20.4545			-1.6129	-3.44828
	2.12	2.27	d	2.195	0.32	0.47	-46.875			0	-3.44828
	2.27	2.34	d	2.305	0.53	0.6	-13.2075
	2.16	2.18	s	2.17	0.42	0.44	-4.7619
	2.23	2.4	d	2.315	0.49	0.66	-34.6939
	2.36	2.43	d	2.395	0.51	0.58	-13.7255		U16	-46.875	-34.6939
	2.28	2.36	d	2.32	0.45	0.53	-17.7778			-39.0244	-34.6939
	2.25	2.27	d	2.26	0.47	0.49	-4.25532			-34.6939	-34.6939
	2.16	2.2	d	2.18	0.44	0.48	-9.09091			-24.3243	-24.3243
	2.23	2.29	d	2.26	0.45	0.51	-13.3333			-23.913	-23.913
	2.19	2.28	d	2.235	0.37	0.46	-24.3243			-20.4545	-20.4545
	2.37	2.47	d	2.42	0.54	0.64	-18.5185			-18.5185	-18.5185
	2.29	2.4	d	2.345	0.46	0.57	-23.913			-17.7778	-17.7778
	2.27	2.32	s	2.295	0.48	0.53	-10.4167			-13.7255	-13.7255
	2.24	2.28	d	2.26	0.51	0.55	-7.84314			-13.3333	-13.3333
	2.29	2.45	d	2.37	0.41	0.57	-39.0244			-13.2075	-13.2075
U15	2.21	2.3	d	2.255	0.44	0.53	-20.4545			-11.1111	-11.1111
	2.19	2.42	d	2.305	0.36	0.59	-63.8889			-10.4167	-10.4167
	2.35	2.38	d	2.365	0.39	0.42	-7.69231			-9.09091	-9.09091
	2.32	2.49	d	2.405	0.44	0.61	-38.6364			-7.84314	-7.84314
	2.49	2.62	s	2.555	0.66	0.79	-19.697			-4.7619	-7.84314
	2.55	2.57	s	2.56	0.63	0.65	-3.1746			-4.25532	-7.84314
	2.14	2.21	d	2.175	0.37	0.44	-18.9189
	2.32	2.34	s	2.33	0.38	0.4	-5.26316
	2.32	2.33	d	2.325	0.49	0.5	-2.04082
	2.36	2.38	s	2.37	0.47	0.49	-4.25532		U15	-63.8889	-20.4545
	2.35	2.36	d	2.355	0.51	0.52	-1.96078			-38.6364	-20.4545
	2.33	2.37	d	2.35	0.5	0.54	-8			-20.4545	-20.4545
	2.46	2.57	d	2.515	0.6	0.71	-18.3333			-19.697	-19.697
	2.31	2.36	d	2.335	0.45	0.5	-11.1111			-18.9189	-18.9189
	2.29	2.31	d	2.3	0.55	0.57	-3.63636			-18.3333	-18.3333
	2.37	2.43	d	2.4	0.59	0.65	-10.1695			-11.1111	-11.1111
	2.41	2.43	d	2.42	0.52	0.54	-3.84615			-10.1695	-10.1695
										-8	-8
										-7.69231	-7.69231
										-5.26316	-5.26316
										-4.25532	-4.25532
										-3.84615	-3.84615
										-3.63636	-3.63636
										-3.1746	-3.1746
										-2.04082	-3.1746
										-1.96078	-3.1746
